# Supplementary material for: Microglial CD74 Expression Is Regulated by TGFβ Signaling
Source: MDPI journal article supplement (doi:10.3390/ijms231810247), 2022-09-06
Supplement: s1 [file s1]

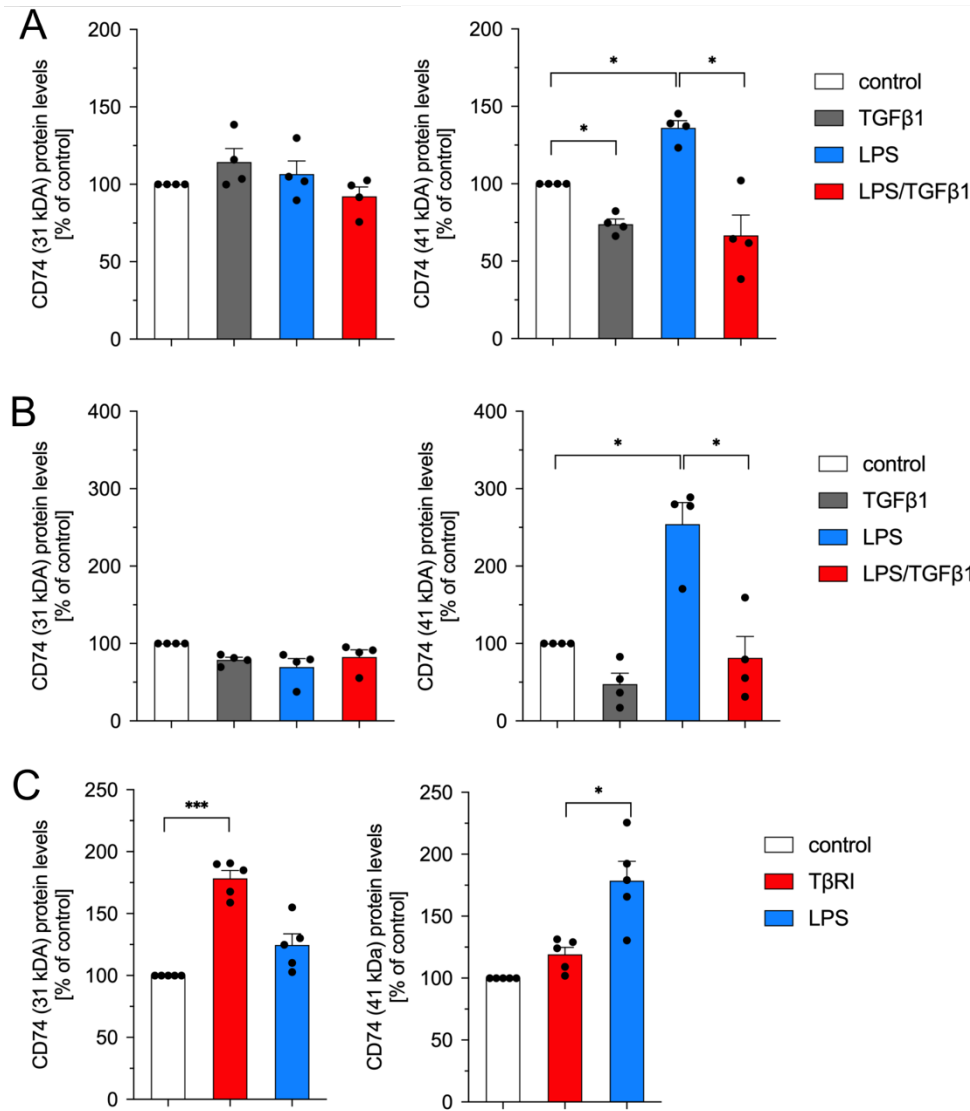

**Figure S1.** Densitometric analysis of 31 kDa and 41 kDa isoform levels in primary microglia. TGFβ1 inhibits LPS-mediated upregulation of Cd74 41 kDa isoform in primary microglia. Levels of 31 kDa and 41 kDa isoforms after treatment of microglia with TGFβ1 (5 ng/ml), LPS (1 μg/ml) or both factors for 6 h (A) and 24 h (B). CD74 isoform levels after treatment of mixed glia cultures with TβRI (500 nM) or LPS (1 μg/ml) for 24 h (C). Data are given as means ± SEM for at least four independent experiments. *P*-values derived from one-way ANOVA followed by Tukey's multiple comparison tests are \**p*<0.05 and \*\*\**p*<0.001.
